# Supplementary material
Source: publisher site journal article supplement (https://www.dovepress.com/article/472286)
Supplement: Supplementary file 1 [file get_supplementary_file.php]

**Supplementary materials**

**Supplement table 1.** Tumor response in all patients

| **Tumor response** | **TACE+Len+T (n=68)** | **TACE+Len (n=68)** | **P value** |
| --- | --- | --- | --- |
| CR | 16 (23.5) | 2 (2.9) |  |
| PR | 33 (48.5) | 18 (26.5) |  |
| SD | 11 (16.2) | 13 (19.1) |  |
| PD | 8 (11.8) | 35 (51.5) |  |
| ORR | 49 (72.1) | 20 (29.4) | <0.001 |
| DCR | 60 (88.2) | 33 (48.5) | <0.001 |

**Notes:** Data were presented as n (%).

**Abbreviations:**

TACE, transarterial chemoembolization; TACE+Len+T, transarterial chemoembolization combined with lenvatinib plus tislelizumab; TACE+Len, transarterial chemoembolization combined with lenvatinib; BCLC, Barcelona clinic liver cancer; CR, complete response; PR, partial response; SD, stable disease; PD, progressive disease; ORR, objective response rate; DCR, disease control rate.

**Supplement table 2.** Tumor response in patients of BCLC B or C stage

| **Tumor response** | **BCLC B stage** | | | **BCLC C stage** | | |
| --- | --- | --- | --- | --- | --- | --- |
| **TACE+Len+T**  **(n=23)** | **TACE+Len**  **(n=22)** | **P value** | **TACE+Len+T**  **(n=45)** | **TACE+Len**  **(n=46)** | **P value** |
| CR | 7 (30.4) | 0 (0.0) |  | 9 (20.0) | 2 (4.3) |  |
| PR | 8 (34.8) | 9 (40.9) |  | 25 (55.6) | 9 (19.6) |  |
| SD | 6 (26.1) | 3 (13.6) |  | 5 (11.1) | 10 (21.7) |  |
| PD | 2 (8.7) | 10 (45.5) |  | 6 (13.3) | 25 (54.3) |  |
| ORR | 15 (65.2) | 9 (40.9) | 0.102 | 34 (75.6) | 11 (23.9) | <0.001 |
| DCR | 21 (91.3) | 12 (54.5) | <0.001 | 39 (86.7) | 21 (45.7) | <0.001 |

**Notes:** Data were presented as n (%).

**Abbreviations:**

TACE, transarterial chemoembolization; TACE+Len+T, transarterial chemoembolization combined with lenvatinib plus tislelizumab; TACE+Len, transarterial chemoembolization combined with lenvatinib; BCLC, Barcelona clinic liver cancer; CR, complete response; PR, partial response; SD, stable disease; PD, progressive disease; ORR, objective response rate; DCR, disease control rate.
